# Supplementary material for: A tutorial in displaying mass spectrometry-based proteomic data using heat maps
Source: PubMed Central journal article supplement (PMC3489527; doi:10.1186/1471-2105-13-s16-s10), 2012-11-05
Supplement: 1471-2105-13-S16-S10-S2.pdf [file 1471-2105-13-S16-S10-S2.pdf]

| Feature                                | <i>heatmap</i> | <i>heatmap.2</i> | <i>heatmap.plus</i> | <i>heatmap_2</i> | <i>heatmap_plus</i> |
|----------------------------------------|----------------|------------------|---------------------|------------------|---------------------|
| Data Reordering                        | ×              | ×                | ×                   | ×                | ×                   |
| Color dendrograms                      |                |                  | ×                   |                  |                     |
| Image Representation                   | ×              | ×                | ×                   | ×                | ×                   |
| Block separation                       |                | ×                |                     |                  |                     |
| Cell labeling                          |                | ×                |                     |                  |                     |
| Level trace                            |                | ×                |                     |                  |                     |
| Color key/legend<br>includes histogram |                | ×                | ×                   | ×                |                     |
| Labeling and grouping                  | ×              | ×                | ×                   | ×                | ×                   |
| adjust margins                         | ×              | ×                | ×                   | ×                | ×                   |
| label rows/columns                     | ×              | ×                | ×                   |                  |                     |
| add group information                  | ×              | ×                | ×                   |                  | ×                   |
| add multivariate group information     |                |                  | ×                   |                  | ×                   |
| Add covariate                          |                |                  |                     |                  | ×                   |
| Layout adjustments                     |                | ×                |                     |                  |                     |

Table 1: Image customization includes the ability to incorporate functions such as `abline` to a plot. Layout adjustments provide the ability to customize the amount of space used by different components of the heat map (dendrograms and image plot)
