# Supplementary material for: A tutorial in displaying mass spectrometry-based proteomic data using heat maps
Source: PubMed Central journal article supplement (PMC3489527; doi:10.1186/1471-2105-13-s16-s10), 2012-11-05

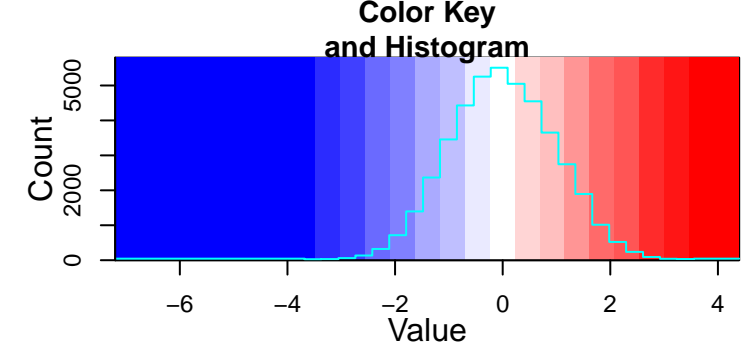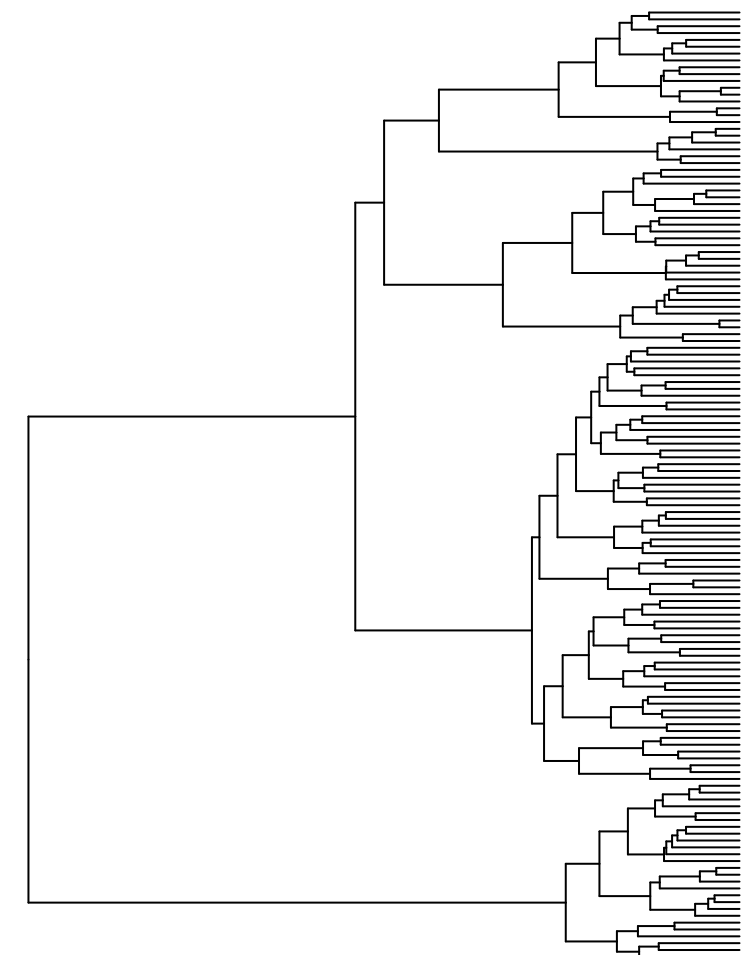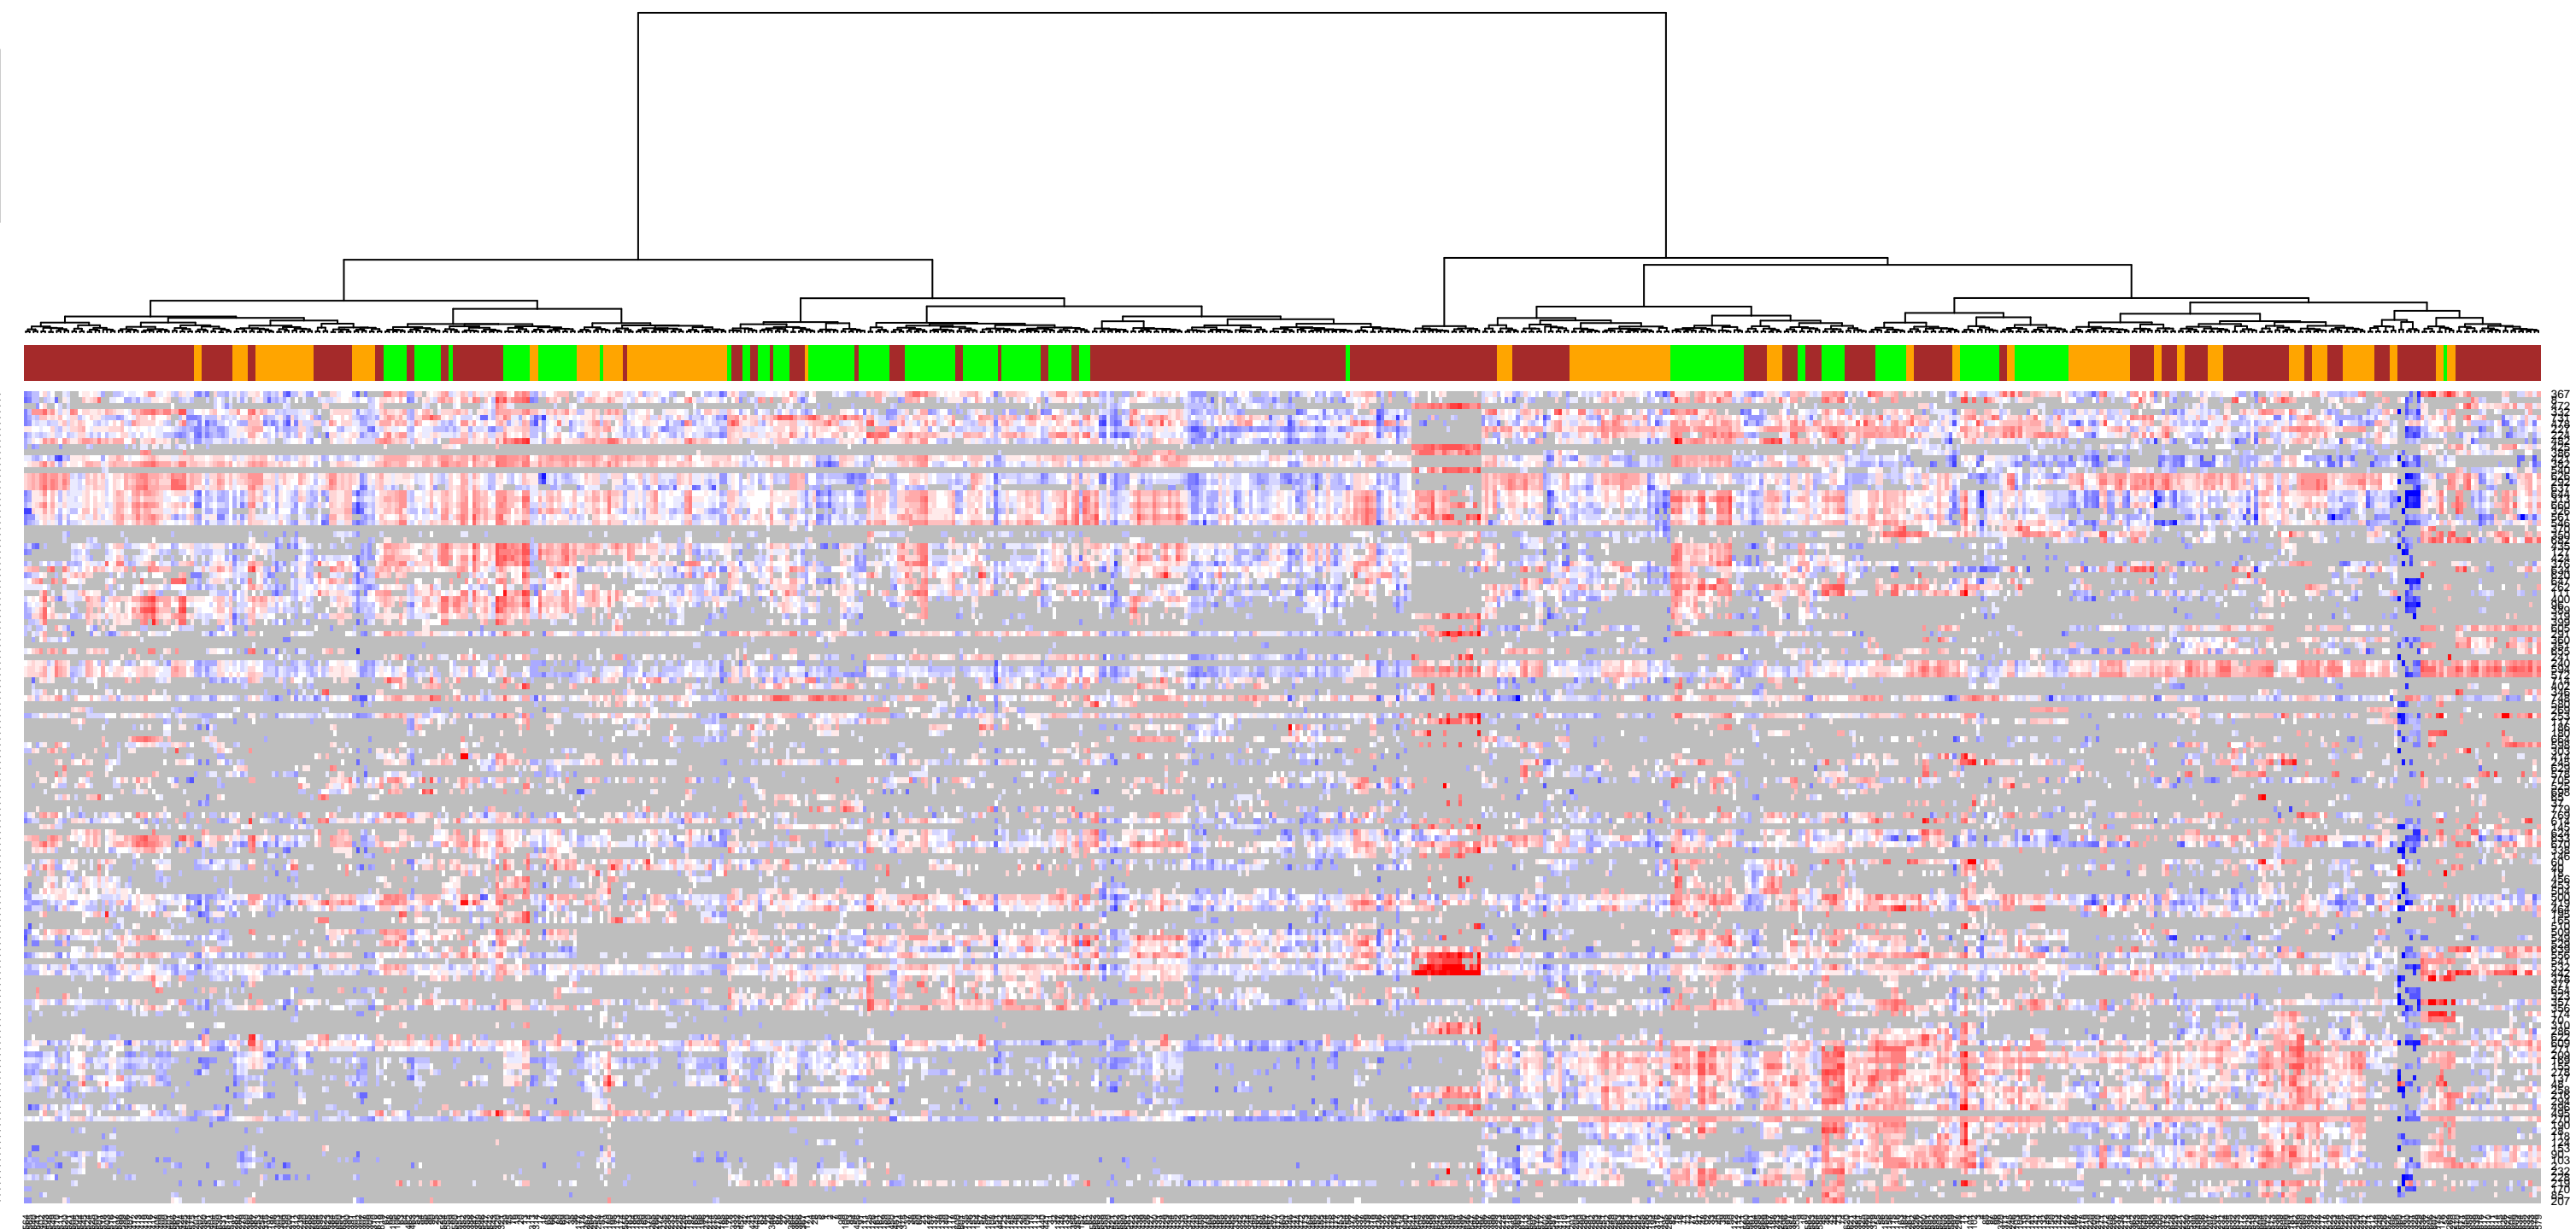

Supplement: 1471-2105-13-S16-S10-S3.pdf [file 1471-2105-13-S16-S10-S3.pdf]
